# Supplementary material for: Anti-Factor-Xa and Activated Partial Thromboplastin Time Concordance and Outcomes in Adults Undergoing Extracorporeal Membrane Oxygenation: A Secondary Analysis of the Pilot Low-Dose Heparin in Critically Ill Patients Undergoing Extracorporeal Membrane Oxygenation Randomized Trial
Source: PubMed Central journal article supplement — Crit Care Explor. 2023 Nov 8;5(11):e0999. doi: 10.1097/CCE.0000000000000999 (PMC10635598; doi:10.1097/cce.0000000000000999), 2023-11-08

## **Supplemental Digital Content**

**Anti-Xa and aPTT concordance and outcomes in adults undergoing ECMO: a secondary analysis of the pilot HELP-ECMO randomised trial**

**TABLE S1. Comparison of main patients characteristics and outcome between those with mainly discordant paired with aPTT relatively lower than anti-Xa (classified discordant ‘low’) and between those with mainly discordant paired with aPTT relatively higher than anti-Xa (classified discordant ‘high’).**

| Variables            | Discordant ‘low’<br>n = 9 | Discordant ‘high’<br>n = 15 | P     |
|----------------------|---------------------------|-----------------------------|-------|
| Age, year            | 35 [23 - 46]              | 40 [31.5 - 62]              | 0.46  |
| Gender, male         | 8 (88.9)                  | 10 (66.7)                   | 0.35  |
| Weight, kg           | 80 [76 - 85]              | 80 [72.5 - 85.5]            | 0.44  |
| APACHE III           | 46.5 [31.7 - 60.3]        | 71 [45.5 - 98.75]           | 0.07  |
| Heparin dose         | 35067<br>[20476 - 49637]  | 21650<br>[12206 - 24690]    | 0.016 |
| Heparin resistance   | 5 (55.6)                  | 1 (6.7)                     | 0.015 |
| Days on ECMO         | 12 [8 – 18]               | 8 [7 – 16]                  | 0.38  |
| Never weaned of ECMO | 1(11.1)                   | 5 (33.3)                    | 0.45  |
| ICU mortality        | 7 (77.8)                  | 10 (66.7)                   | 0.67  |
| Hospital mortality   | 7 (77.8)                  | 9 (60)                      | 0.66  |

ECMO = Extra Corporeal Membrane Oxygenation, ICU = Intensive Care Unit,

Continuous variables are expressed as median [IQR] and categorical variables are expressed as percentage.

**TABLE S2: Comparison of characteristics and outcomes of patients with and without heparin resistance. Continuous variables are expressed as median [IQR] and categorical variables are expressed as percentage.**

| Variables                             | Overall<br>n = 32     | No heparin resistance<br>n =26 | Heparin resistance<br>n = 6 | P      |
|---------------------------------------|-----------------------|--------------------------------|-----------------------------|--------|
| Age, years                            | 38 [26.8 - 57.8]      | 45 [30.5 - 60.8]               | 27 [22.3 - 33.3]            | 0.04   |
| Gender, male                          | 24 (75)               | 18 (69.2)                      | 6 (100)                     | 0.3    |
| Weight, kg                            | 79 [69.8 - 85.3]      | 78 [66, 85]                    | 81.5 [73.5 - 92.5]          | 0.28   |
| APACHE III score                      | 57.5 [45.5 - 88.3]    | 64 [53.8 - 91.3]               | 37.5 [21.3 - 41.8]          | 0.001  |
| <b>Comorbidities</b>                  |                       |                                |                             |        |
| - Immunosuppressed                    | 4 (12.5)              | 4 (15.4)                       | 0 (0)                       | 0.57   |
| - Respiratory failure                 | 3 (9.4)               | 3 (11.5)                       | 0 (0)                       | 1      |
| - Cardiovascular disease              | 5 (15.6)              | 4 (15.4)                       | 1 (16.7)                    | 1      |
| - Renal failure                       | 1 (3.1)               | 1 (3.8)                        | 0 (0)                       | 1      |
| - Insulin dependent diabetes          | 1 (3.1)               | 1 (3.8)                        | 0 (0)                       | 1      |
| Ongoing sepsis prior to ECMO          | 15 (46.9)             | 12 (46.2)                      | 3 (50)                      | 1      |
| Heparin dose (UI/day)                 | 20476 [11176 – 29904] | 14000 [10518 - 22823]          | 43002 [35393 - 50501]       | <0.001 |
| Group of randomization, n (%)         |                       |                                |                             | 0.65   |
| - 'Low dose heparin' group            | 16 (50)               | 14 (53.8)                      | 2 (33.3)                    |        |
| - 'Therapeutic anticoagulation' group | 16 (50)               | 12 (46.2)                      | 4 (66.7)                    |        |
| <b>ECMO type</b>                      |                       |                                |                             |        |
| - VV ECMO                             | 23 (71.9)             | 17 (70.8)                      | 6 (100.0)                   | 0.290  |
| - VA ECMO                             | 9 (28.1)              | 9 (36)                         | 0 (0)                       | 0.145  |
| <b>Indications for VV ECMO</b>        |                       |                                |                             |        |
| - Asthma                              | 2 (6.2)               | 2 (7.7)                        | 0 (0)                       | 0.27   |
| - Bacterial or viral pneumonia        | 9 (28.1)              | 3 (11.5)                       | 1 (16.7)                    |        |
| - Lung Transplantation                | 3 (9.3)               | 1 (3.8)                        | 0 (0)                       |        |
| - Other respiratory disorders         | 9 (28.1)              | 5 (19.2)                       | 4 (66.7)                    |        |
| <b>Indications for VA ECMO</b>        |                       |                                |                             |        |
| - Acute cardiomyopathy                | 2 (6.2)               | 2 (7.7)                        | 0 (0)                       | n.a.   |
| - AMI                                 | 1 (3.1)               | 1 (3.8)                        | 0 (0)                       |        |
| - Heart Transplantation               | 3 (9.4)               | 3 (11.5)                       | 0 (0)                       |        |
| - Myocarditis                         | 1 (3.1)               | 1 (3.8)                        | 0 (0)                       |        |
| - Other                               | 2 (6.2)               | 2 (7.7)                        | 0 (0)                       |        |
| <b>Outcomes</b>                       |                       |                                |                             |        |
| <b>ECMO outcomes</b>                  |                       |                                |                             |        |
| Days on ECMO                          | 8 [5.5 - 14]          | 7.5 [5 - 10.5]                 | 18 [14.3 - 18]              | 0.006  |
| <b>Weaning (n, %)</b>                 |                       |                                |                             |        |
| No                                    | 7 (21.9)              | 6 (23.1)                       | 1 (16.7)                    | 1      |
| Yes                                   | 24 (75)               | 19 (73.1)                      | 5 (83.3)                    |        |
| ICU mortality                         | 23 (71.9)             | 19 (73.1)                      | 4 (66.7)                    | 1      |
| Hospital mortality                    | 22 (68.8)             | 18 (69.2)                      | 4 (66.7)                    | 1      |

APACHE = Acute Physiology and Chronic Health Evaluation, ECMO = Extra Corporeal Membrane Oxygenation, ICU = Intensive Care Unit, VA = Veno arterial, VV = Veno venous.

**TABLE S3: Comparison of biological parameters between heparin resistance states and no heparin resistance states in patients randomized in the ‘therapeutic anticoagulation’ group (n = 16).**

| Variables**                               | No heparin resistance<br>n = 317 | Heparin resistance<br>n = 25 | p*      |
|-------------------------------------------|----------------------------------|------------------------------|---------|
| aPTT (seconds)                            | 59 [50 - 67]                     | 42 [36 - 48]                 | < 0.001 |
| Anti-Xa (IU/L)                            | 0.33 [0.13 - 0.5]                | 0.28 [0.06 - 0.38]           | < 0.001 |
| Lowest Hb (g/L)                           | 80 [74, 90]                      | 88 [82, 92]                  | 0.06    |
| Highest Hb (g/L)                          | 94 [88, 102]                     | 98 [93, 101]                 | 0.046   |
| Highest plasma free Hb (g/L)              | 5 [3, 8]                         | 7 [5, 11]                    | 0.83    |
| Lowest corrected ionised calcium (mmol/L) | 1.11 [1.04, 1.19]                | 2.28 [1.09, 2.34]            | 0.73    |
| Highest Urea (mmol/L)                     | 11 [8, 14]                       | 13 [10, 15]                  | 0.77    |
| Highest Bilirubin (µmol/L)                | 12 [9, 18]                       | 26 [9.3, 27]                 | 0.006   |
| Lowest Arterial pH                        | 7.36 [7.3, 7.43]                 | 7.36 [7.34, 7.42]            |         |
| Highest D-dimer (mg/L)                    | 113 [33, 161]                    | 180 [169, 217]               | < 0.001 |
| Highest INR                               | 1.2 [1.1, 1.3]                   | 1.2 [1.1, 1.3]               | 0.54    |
| Lowest INR                                | 1.2 [1, 1.3]                     | 1.2 [1.1, 1.2]               | 0.35    |
| Highest Fibrinogen (g/L)                  | 4.5 [3.2, 5.8]                   | 5.8 [5.4, 6.9]               | 0.5     |
| Lowest Fibrinogen (g/L)                   | 4.7 [3.8, 6.1]                   | 5.1 [4.1, 6.9]               | 0.12    |
| Highest PT (sec)                          | 14.90 [13.9, 16.17]              | 15.8 [14.7, 16.2]            | 0.81    |
| Lowest PT (sec)                           | 15.3 [13.9, 16.2]                | 15.4 [14.7, 15.8]            | 0.77    |
| Highest platelet count (G/L)              | 141 [93.8, 226]                  | 153 [97, 182]                | 0.76    |
| Lowest platelet count (G/L)               | 151.5 [84.8, 241]                | 153 [97, 182]                | 0.95    |
| Daily heparin dose, UI/24h                | 21600 [12000, 31800]             | 48800 [42900, 60000]         | 0.02    |
| aPTT/anti-Xa Discordance (n, %)           |                                  |                              |         |
| - Concordant aPTT/anti-Xa                 | 190 (59.9)                       | 16 (64)                      | < 0.001 |
| - aPTT relatively lower than anti-Xa      | 31 (9.8)                         | 9 (36)                       |         |
| - aPTT relatively higher than anti-Xa     | 96 (30.3)                        | 0 (0)                        |         |

aPTT: activated Partial Thromboplastin Time, Hb: Haemoglobin, INR: International Normalized Ratio, PT: Pro-Thrombin time.

\*\*highest and lowest values are for the day of the heparin resistance episode

**FIGURE S1. Scatter plot represented paired aPTT/anti-Xa in standard dose group (therapeutic anticoagulation).** Each paired value was classified in three groups: ‘aPTT

comparable to anti-Xa' (blue circle); 'aPTT relatively lower than anti-Xa level' (green square) and 'aPTT relatively higher than anti-Xa level' (red diamond).

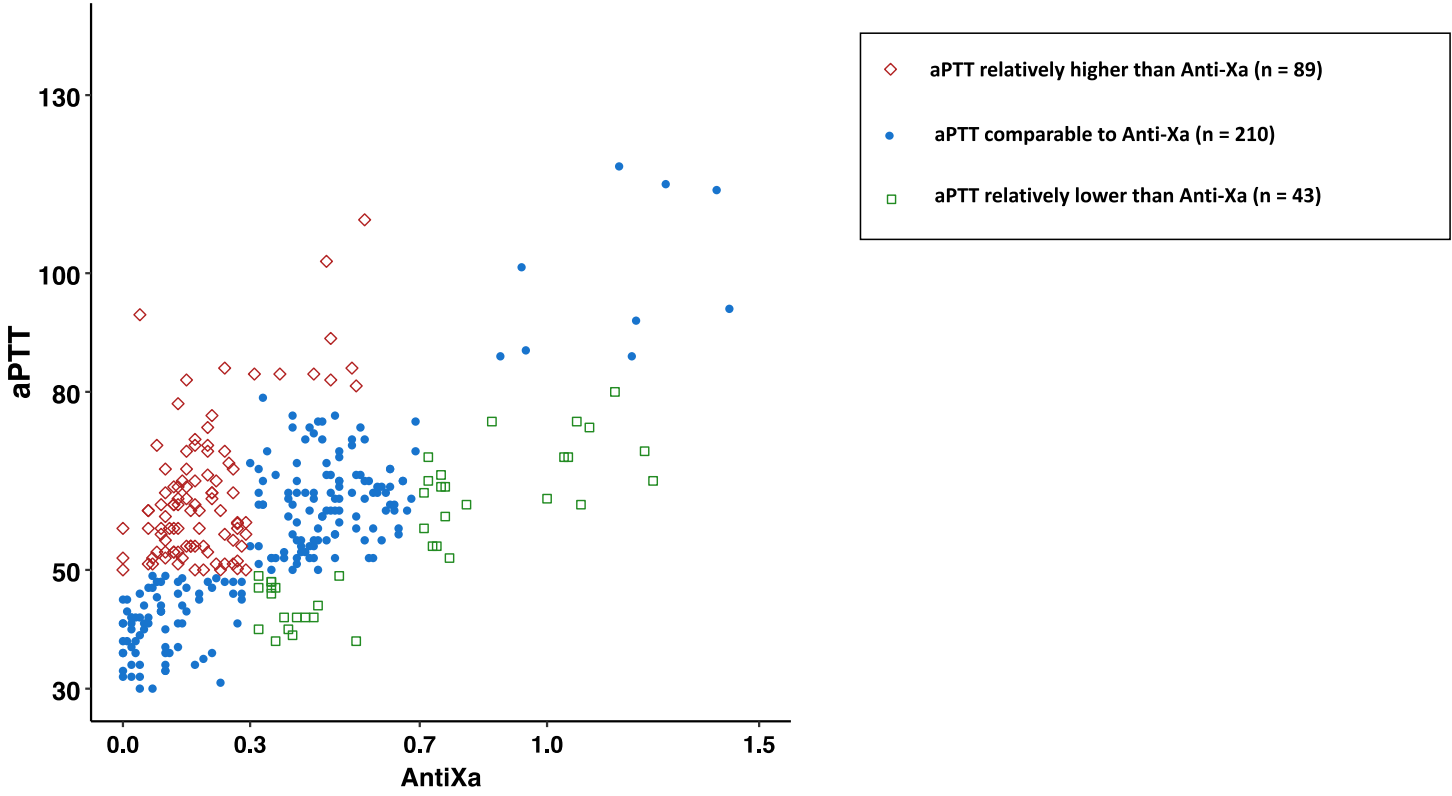

**FIGURE S2. Scatter plot represented paired aPTT/anti-Xa in low dose group.** Each paired value was classified in three groups: 'aPTT comparable to anti-Xa' (blue circle); 'aPTT relatively low to anti-Xa level' (green square) and 'aPTT relatively high to anti-Xa level' (red diamond).

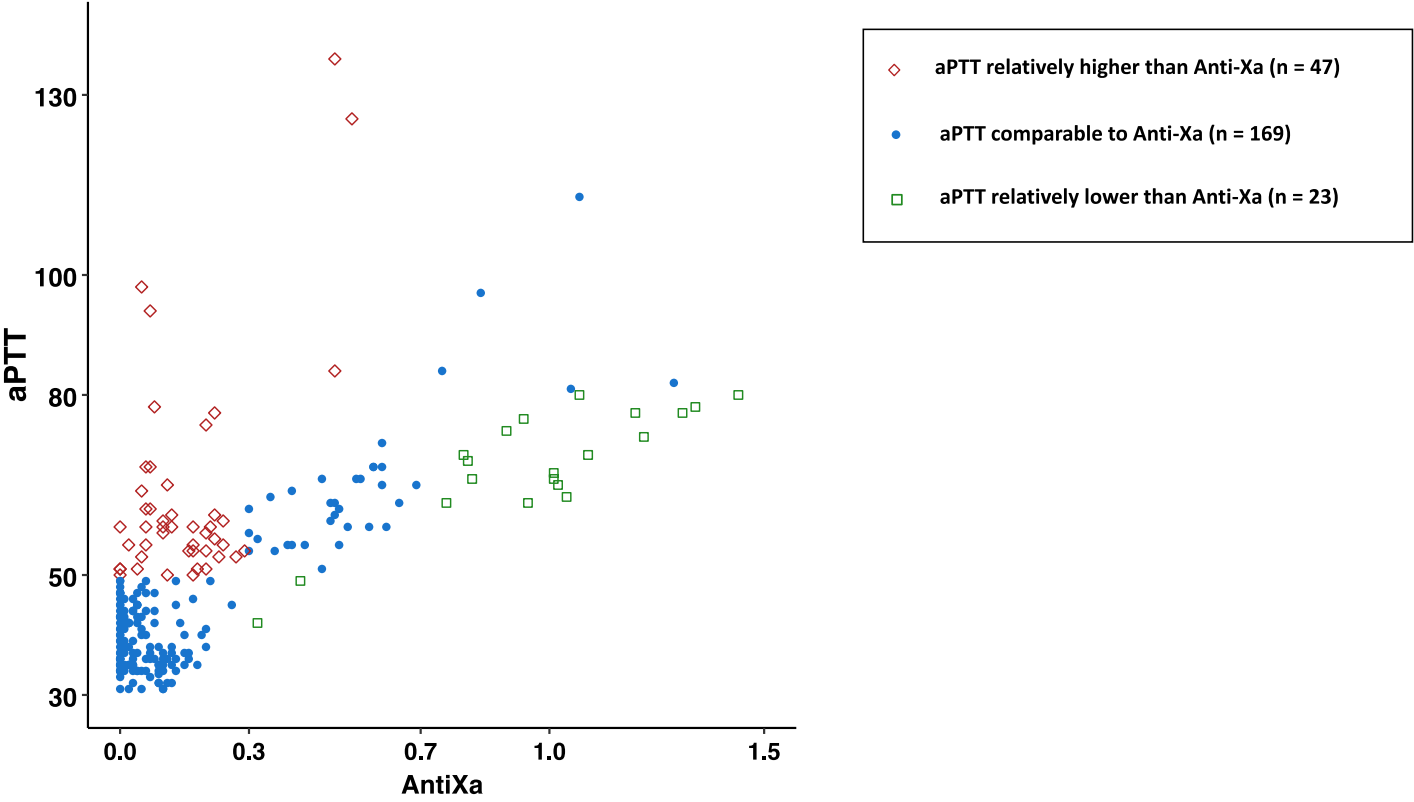

Supplement: cc9-5-e0999-s001.pdf [file cc9-5-e0999-s001.pdf]
